# Supplementary material
Source: PubMed Central journal article supplement (PMC4943468)
Supplement: Supp_Figure1.pdf [file Supp_Figure1.pdf]

## Supplementary Data

|   | 9 | 8  | 7  | 6  | 5  | 4  | 3  | 2  | 1  |    |
|---|---|----|----|----|----|----|----|----|----|----|
|   |   | 1  | 0  | 4  | 5  | 6  | 5  | 2  | 3  | 1  |
|   |   | 2  | 0  | 0  | 0  | 2  | 1  | 0  | 0  | 2  |
| 2 |   | 6  | 0  | 0  | 6  | 8  | 14 | 10 | 5  | 3  |
|   |   | 4  | 2  | 6  | 5  | 4  | 5  | 0  | 0  | 4  |
|   |   | 1  | 15 | 3  | 0  | 1  | 0  | 1  | 4  | 5  |
| 4 |   | 6  | 6  | 2  | 0  | 12 | 11 | 3  | 0  | 6  |
| 8 |   | 11 | 5  | 2  | 22 | 6  | 17 | 1  | 3  | 7  |
|   |   |    | 2  | 5  | 5  | 5  | 5  | 3  | 1  | 8  |
|   |   | 21 | 28 | 11 | 5  | 4  | 2  | 3  | 2  | 9  |
| 2 |   | 17 | 20 | 13 | 19 | 7  | 12 | 19 | 28 | 10 |
| 2 |   | 0  | 0  | 2  | 7  | 10 | 5  | 0  | 9  | 11 |

**SUPPLEMENTARY FIG. S1.** Grid pattern for data acquisition. For each set of experiments, the images were taken daily of each sample in a grid pattern for the entire  $1 \times 1$  cm patterned surface. The grid is composed of successive rectangular images ( $1600 \times 1200$  pixel) that are numbered sequentially (*column* and *row*) from one end to the other end of the microgrooves and from *top* to *bottom*. The number of cells in each image were counted and entered into each grid.
