# Supplementary material
Source: PubMed Central journal article supplement (PMC4943468)
Supplement: Supp_Figure2.pdf [file Supp_Figure2.pdf]

|   | 9 | 8  | 7  | 6  | 5  | 4  | 3  | 2  | 1  |    |
|---|---|----|----|----|----|----|----|----|----|----|
|   |   | 1  | 0  | 4  | 5  | 6  | 5  | 2  | 3  | 1  |
|   |   | 2  | 0  | 0  | 0  | 2  | 1  | 0  | 0  | 2  |
| 2 |   | 6  | 0  | 0  | 6  | 8  | 14 | 10 | 5  | 3  |
|   |   | 4  | 2  | 6  | 5  | 4  | 5  | 0  | 0  | 4  |
|   |   | 1  | 15 | 3  | 0  | 1  | 0  | 1  | 4  | 5  |
| 4 |   | 6  | 6  | 2  | 0  | 12 | 11 | 3  | 0  | 6  |
| 8 |   | 11 | 5  | 2  | 22 | 6  | 17 | 1  | 3  | 7  |
|   |   |    | 2  | 5  | 5  | 5  | 5  | 3  | 1  | 8  |
|   |   | 21 | 28 | 11 | 5  | 4  | 2  | 3  | 2  | 9  |
| 2 |   | 17 | 20 | 13 | 19 | 7  | 12 | 19 | 28 | 10 |
| 2 |   | 0  | 0  | 2  | 7  | 10 | 5  | 0  | 9  | 11 |

**SUPPLEMENTARY FIG. S2.** Definition of leading edge. The leading edge is defined as the furthest location that the cells traversed in each *row* and is highlighted in *yellow*. An equivalent distance (*e*) of image *x*-*y* was calculated by multiplying the *column* number (*x*) by the actual length of the image (*l*).
