# Supplementary material
Source: PubMed Central journal article supplement (PMC4943468)
Supplement: Supp_Figure4.pdf [file Supp_Figure4.pdf]

|  | 9 | 8 | 7 | 6 | 5 | 4 | 3 | 2 | 1 |     |
|--|---|---|---|---|---|---|---|---|---|-----|
|  | 0 | 1 | 0 | 0 | 0 | 0 | 0 | 0 | 0 | 01  |
|  | 0 | 1 | 0 | 0 | 0 | 0 | 0 | 0 | 0 | 02  |
|  | 1 | 0 | 0 | 0 | 0 | 0 | 0 | 0 | 0 | 03  |
|  | 0 | 1 | 0 | 0 | 0 | 0 | 0 | 0 | 0 | 04  |
|  | 0 | 1 | 0 | 0 | 0 | 0 | 0 | 0 | 0 | 05  |
|  | 1 | 0 | 0 | 0 | 0 | 0 | 0 | 0 | 0 | 06  |
|  | 1 | 0 | 0 | 0 | 0 | 0 | 0 | 0 | 0 | 07  |
|  | 0 | 0 | 1 | 0 | 0 | 0 | 0 | 0 | 0 | 08  |
|  | 0 | 1 | 0 | 0 | 0 | 0 | 0 | 0 | 0 | 09  |
|  | 1 | 0 | 0 | 0 | 0 | 0 | 0 | 0 | 0 | 010 |
|  | 1 | 0 | 0 | 0 | 0 | 0 | 0 | 0 | 0 | 011 |

**SUPPLEMENTARY FIG. S4.** Binary method. The binary method counts images as yes (1) or no (0), and it converts the entire grid into a binary field where only the images marked as “1,” highlighted in *yellow*, are selected for subsequent calculations.
